# Supplementary material for: Quo vadis, smallholder forest landscape? An introduction to the LPB-RAP model
Source: PubMed Central journal article supplement (PMC10836681; doi:10.1371/journal.pone.0297439), 2024-02-02
Supplement: pone.0297439.s005.pdf [file pone.0297439.s005.pdf]

### **S5 File – GitHub repository link**

Under the given link are all required model files and simulation data provided, a link to the model manual and all secondary modeling results. The repository is available after publication.

**S5 File to: “Quo vadis, smallholder forest landscape? An introduction to the LPB-RAP model.”**

**Link:**

<https://github.com/LPB-SDSS/LPB-RAP>
